# Supplementary material for: Molecular and functional profiling identifies therapeutically targetable vulnerabilities in plasmablastic lymphoma
Source: PubMed Central journal article supplement (PMC8408158; doi:10.1038/s41467-021-25405-w), 2021-08-31
Supplement: 41467_2021_25405_MOESM3_ESM.pdf [file 41467_2021_25405_MOESM3_ESM.pdf]

## **Description of Additional Supplementary Files**

**Supplementary Data 1:** Overview of all primary PBL samples with corresponding clinical and experimental data (IHC/FISH, WES, and SNP).

**Supplementary Data 2:** Overview of the optimized multistage filter hierarchy showing all variant filter steps in the applied order for calling somatic mutations.

**Supplementary Data 3:** Cancer gene prediction according to MutSig2CV.

**Supplementary Data 4:** List of all called somatic variants in 85 primary PBL samples.

**Supplementary Data 5:** Subcohort comparisons for selected gene sets.

**Supplementary Data 6:** Mutations revealed by targeted resequencing of the selected cancer candidate genes TP53, NRAS, KRAS, BRAF, STAT3, and TET2.

**Supplementary Data 7:** List of recurrent somatic copy number alterations in 82 primary PBL samples.

**Supplementary Data 8:** Gene level view of copy number alterations in 82 primary PBL samples and the PBL-1 cell line.

**Supplementary Data 9:** Survival analysis for preselected variables using log-rank tests and unbiased univariate screening of all available biological covariates using Cox proportional hazard models.

**Supplementary Data 10:** Depletion ratios of all used shRNAs in the performed shRNA screen.
